# Supplementary material for: Moderate nucleotide diversity in the Atlantic herring is associated with a low mutation rate
Source: eLife journal article supplement (doi:10.7554/elife.23907), 2017-06-30
Supplement: supp [file elife-23907-supp-v1.zip]

Archive with 4 entries (4 files):
- elife_poa_e23907_Supplementary_File_1.docx
- elife_poa_e23907_Supplementary_File_2.docx
- elife_poa_e23907_Figure_1_figure_supplement_1.pdf
- elife_poa_e23907_Supplementary_File_3.docx
