# Supplementary material for: Moderate nucleotide diversity in the Atlantic herring is associated with a low mutation rate
Source: eLife journal article supplement (doi:10.7554/elife.23907), 2017-06-30
Supplement: supp [file elife-23907-supp-v1.zip › elife_poa_e23907_Figure_1_figure_supplement_1.pdf]

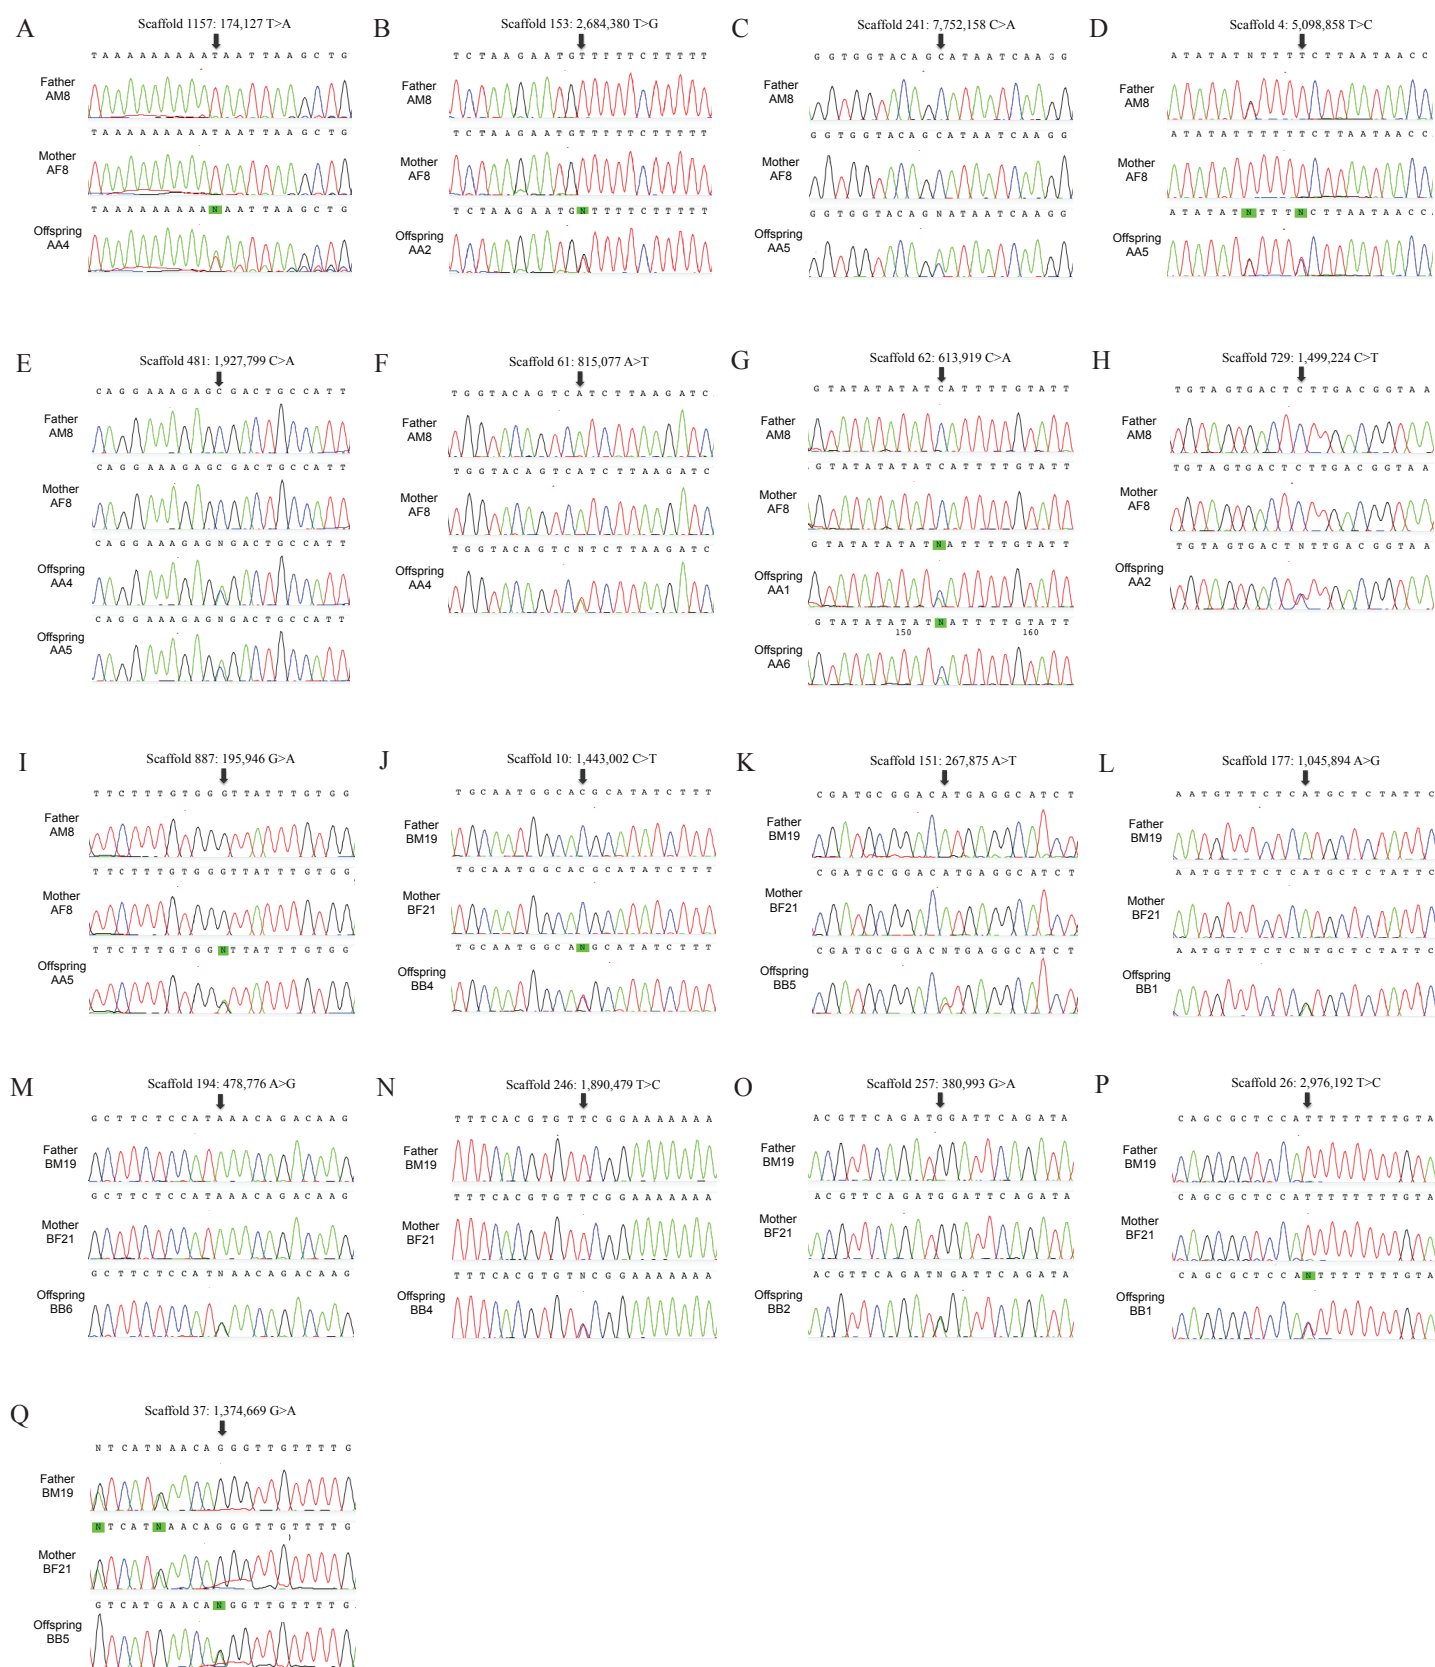

**Figure 1—figure supplement 1.**

**Sanger sequencing chromatograms of the *de novo* mutations.**

Chromatograms from the identified target offspring and its parents for each region containing a candidate *de novo* mutation.
